# Supplementary material for: Effects of CYP3A4/5 and ABC transporter polymorphisms on osimertinib plasma concentrations in Japanese patients with non-small cell lung cancer
Source: Research Square preprint supplement (doi:10.21203/rs.3.rs-1848607/v2), 2022-08-29
Supplement: Supplementary file 1 [file 08d531dad10cfd4af4ac4a5d.xlsx]

## Sheet: Table 4
Table 4 Comparison of the AUC0-24 or C0 of osimertinib between genotypes of CYP3A4/5 or ABC transporters
Parameters/characteristics	n	AUC0-24						P value	C0						P value
		Median (quartile 1 - quartile 3)							Median (quartile 1 - quartile 3)
CYP3A4 20230G>A(*1G)								0.449*							0.347*
*1/*1	12	7919	(	5985	-	8552	)		241	(	171	-	294	)
*1/*1G	11	8988	(	4020	-	12295	)		272	(	133	-	422	)
CYP3A5								0.392*							0.466*
*1/*3	8	6890	(	3930	-	10740	)		233	(	125	-	343	)
*3/*3	15	8325	(	7081	-	9669	)		253	(	175	-	331	)
ABCB1 1236C>T								0.788†							0.945†
C/C	5	7312	(	4295	-	10310	)		247	(	140	-	377	)
C/T	7	8470	(	5619	-	11324	)		235	(	175	-	366	)
T/T	11	8285	(	7081	-	9384	)		253	(	170	-	298	)
ABCB1 2677G>T/A								0.090†							0.168†
G/G	3	10380	(	9384	-		)		314	(	281	-		)
G/T + G/A	8	7250	(	4922	-	8423	)		213	(	162	-	250	)
T/T + T/A + A/A	12	7939	(	4663	-	10910	)		260	(	142	-	361	)
ABCB1 3435C>T								0.944†							0.728†
C/C	10	7798	(	5387	-	10858	)		267	(	171	-	354	)
C/T	6	8397	(	5949	-	9266	)		230	(	176	-	277	)
T/T	7	7553	(	3594	-	9669	)		272	(	99	-	344	)
ABCG2 421C>A								0.608*							0.786*
C/C	12	7073	(	4187	-	11087	)		253	(	139	-	353	)
C/A	11	8325	(	7188	-	8988	)		247	(	190	-	331	)
ABCC2 -24C>T								0.449*							0.880*
C/C	11	8580	(	4020	-	11324	)		247	(	133	-	366	)
C/T+T/T	12	7432	(	5862	-	8858	)		244	(	171	-	323	)
Data are presented as number or median (quartile 1 - quartile 3)
AUC0-24, area under the plasma concentration-time curve from 0 to 24 h; C0, trough plasma concentration
*Mann-Whitney U test.
†Kruskal-Wallis test.
