# Supplementary material for: Effects of CYP3A4/5 and ABC transporter polymorphisms on osimertinib plasma concentrations in Japanese patients with non-small cell lung cancer
Source: Research Square preprint supplement (doi:10.21203/rs.3.rs-1848607/v2), 2022-08-29
Supplement: Supplementary file 2 [file c1372632affe5e5d33e843fe.xlsx]

## Sheet: Table 3
Table 3 Comparisons of patient background or osimertinib-induced side effects and AUC0–24 or C0 of osimertinib
Parameters/characteristics	n	AUC0-24						P value	C0						P value
		Median (quartile 1 - quartile 3)							Median (quartile 1 - quartile 3)
Sex								0.636*							0.925*
Woman	15	8470	(	4690	-	11324	)		235	(	157	-	366	)
Man	8	7432	(	7108	-	8912	)		263	(	188	-	310	)
Age								0.074*							0.062*
≥ 75 years	6	4355	(	3738	-	9075	)		145	(	114	-	277	)
< 75 years	17	8470	(	7134	-	10024	)		272	(	208	-	338	)
Osimertinib therapy								0.413*							0.222*
First-line	7	9384	(	4020	-	12295	)		331	(	133	-	422	)
Second-line or later	16	7919	(	5862	-	8886	)		238	(	171	-	292	)
EGFR mutation status								0.624*							0.175*
Exon 19	16	7919	(	6715	-	10202	)		263	(	188	-	341	)
Exon 21	7	8470	(	3594	-	9384	)		190	(	99	-	281	)
Smoking								0.522*							0.784*
Yes	10	8525	(	6959	-	9847	)		254	(	185	-	334	)
No	13	7553	(	4355	-	10354	)		247	(	145	-	332	)
Antacid								0.021†							0.046†
None	6	6350	(	3738	-	7279	)		173	(	114	-	255	)
H2RAs or PPI	8	8305	(	5165	-	8858	)		241	(	174	-	267	)
P-CAB	9	9669	(	7946	-	13313	)		331	(	236	-	404	)
Side effects
Diarrhea
Yes	6	6952	(	3824	-	8590	)	0.201*	211	(	116	-	260	)	0.177*
No	17	8470	(	6837	-	10852	)		272	(	180	-	355	)
Skin rash
Yes	5	8325	(	5604	-	10982	)	0.745*	247	(	187	-	383	)	0.638*
No	18	7919	(	5387	-	9633	)		244	(	167	-	318	)
Hepatotoxicity
Yes	5	9669	(	6465	-	13047	)	0.257*	331	(	245	-	432	)	0.080*
No	18	7919	(	4522	-	9087	)		238	(	151	-	285	)
Data are presented as number or median (quartile 1 - quartile 3)
AUC0-24, area under the plasma concentration-time curve from 0 to 24 h; C0, trough plasma concentration; H2RAs, histamine 2-receptor antagonists; PPI, proton pump inhibitor; P-CAB, potassium-competitive acid blocker
*Mann-Whitney U test.
†Kruskal-Wallis test.
