# Supplementary material for: Effects of CYP3A4/5 and ABC transporter polymorphisms on osimertinib plasma concentrations in Japanese patients with non-small cell lung cancer
Source: Research Square preprint supplement (doi:10.21203/rs.3.rs-1848607/v2), 2022-08-29
Supplement: Supplementary file 3 [file d22b1a6e9fa93865882034ba.xlsx]

## Sheet: Table 1
Table 1. Clinical characteristics of patients taking osimertinib
Characteristics	Number
Women : Men	15 : 8
Stage IV : IIIb	22 : 1
Tumor history, Adenocarcinoma : Other	23 : 0
Osimertinib therapy, First-line : second-line or later	7 : 16
EGFR mutation, exon19 deletions : exon21 L858R	16 : 7
CYP3A4 20230G>A(*1G), *1/*1 : *1/*1G : *1G/*1G	12 : 11 : 0
CYP3A5*1/*1 : *1/*3 : *3/*3	0 : 8 : 15
ABCB1 1236C>T, C/C : C/T : T/T	5 : 7 : 11
ABCB1 2677G>T/A, G/G : G/T : G/A : T/T : T/A : A/A	3 : 4 : 4 : 7 : 4 : 1
ABCB1 3435C>T, C/C : C/T : T/T	10 : 6 : 7
ABCG2 421C>A, C/C : C/A : A/A	12 : 11 : 0
ABCC2 -24C>T, C/C : C/T : T/T	11 : 10 : 2
H2RAs : PPI : P-CAB : none	2 : 6 : 9 : 6
Diarrhea, Grade 1 : Grade 2 : No diarrhea	4 : 2 : 17
Skin rash, Grade 1 : Grade 2 : No skin rash	3 : 2 : 18
Hepatotoxicity, Grade 1 : Normal function	5 : 18
	Mean ± standard deviation	Range
Age, years	68.6 ± 8.2	(53 - 82)
Body weight, kg	55.5 ± 13.8	(33.8 - 89.5)
Body surface area, m2	1.54 ± 0.21	(1.20 - 1.95)
Laboratory test values
White blood cell, ×103/mm3	6.2 ± 2.0	(3.9 - 11.6)
Red blood cell, ×104/mm3	410 ± 52	(277 - 535)
Hemoglobin, g/dL	12.4 ± 1.5	(8 - 15)
Platelets, ×104/mm3	257 ± 65	(81 - 373)
Aspartate aminotransferase, IU/L	25.5 ± 6.9	(18 - 47)
Alanine aminotransferase, IU/L	27.1 ± 22.2	(9 - 91)
Serum albumin, g/dL	3.6 ± 0.6	(2.5 - 4.6)
Total bilirubin, mg/dL	0.6 ± 0.4	(0.2 - 1.7)
Serum creatinine, mg/dL	0.69 ± 0.22	(0.29 - 1.19)
Data are presented as number or mean ± standard deviation (range).
H2RAs, histamine 2-receptor antagonists; PPI, proton pump inhibitor; P-CAB, potassium-competitive acid blocker
